# Supplementary material for: Label-Free Biosensor Using a Silver Specific RNA-Cleaving DNAzyme Functionalized Single-Walled Carbon Nanotube for Silver Ion Determination
Source: PubMed Central journal article supplement (PMC5923588; doi:10.3390/nano8040258), 2018-04-20
Supplement: nanomaterials-08-00258-s001.pdf [file nanomaterials-08-00258-s001.pdf]

## Supporting Information

# Label-free biosensor using a silver specific RNA-cleaving DNzyme functionalized single-walled carbon nanotube for silver ion determination

Hui Wang<sup>1</sup>, Yang Liu<sup>2</sup> and Gang Liu<sup>2, \*</sup>

1. Key Laboratory of Modern Precision Agriculture System Integration Research, Ministry of Education and Key Laboratory of Agricultural Information Acquisition Technology, Ministry of Agriculture China Agricultural University, Beijing 100083, P.R. China. [wanghui\\_lunwen@163.com](mailto:wanghui_lunwen@163.com) (H. W.);
  2. Xi'an Jiaotong University, School of Electronic and Information Engineering, Xi'an 710049, P.R. China. [yliu@sei.xjtu.edu.cn](mailto:yliu@sei.xjtu.edu.cn) (Y. L.)
- \* Correspondence: [pac@cau.edu.cn](mailto:pac@cau.edu.cn); Tel.: +86-10-6273-6741

**Keywords:** Biosensor; Field effect transistor; Single carbon nanotube; Silver ion, Biosensor; DNzyme

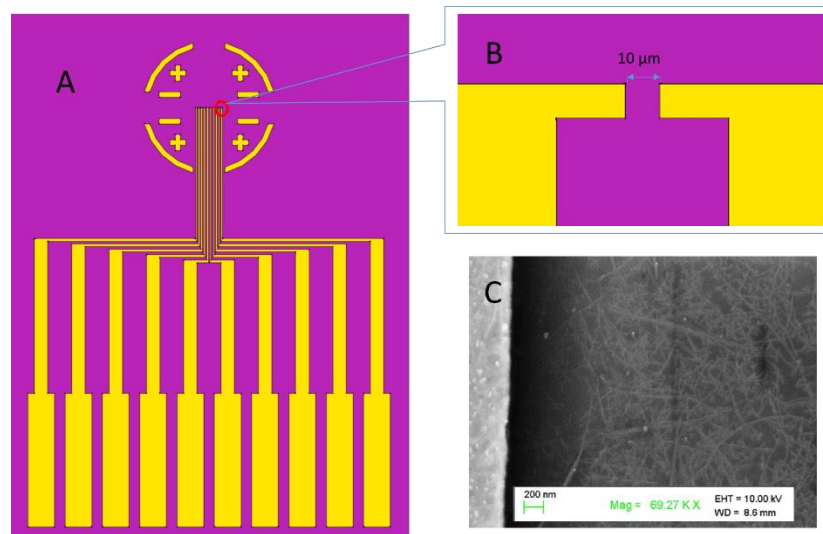

**Figure S1.** SEM image of SWNT networks produced by APTES-assisted assembly technique.

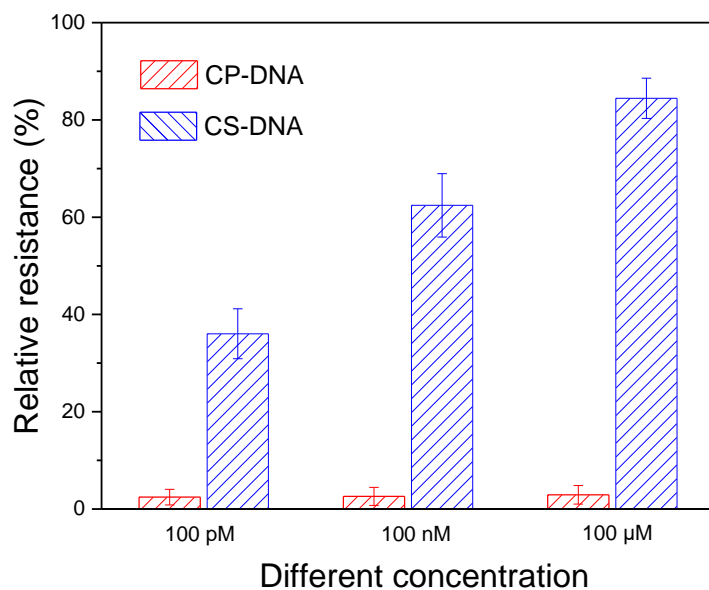

**Figure S2.** Effect of the 'A' base type of the Ag cleavage junction on the performance of the biosensor with the three Ag(I) concentrations (100 pM, 100 nM, 100 μM).

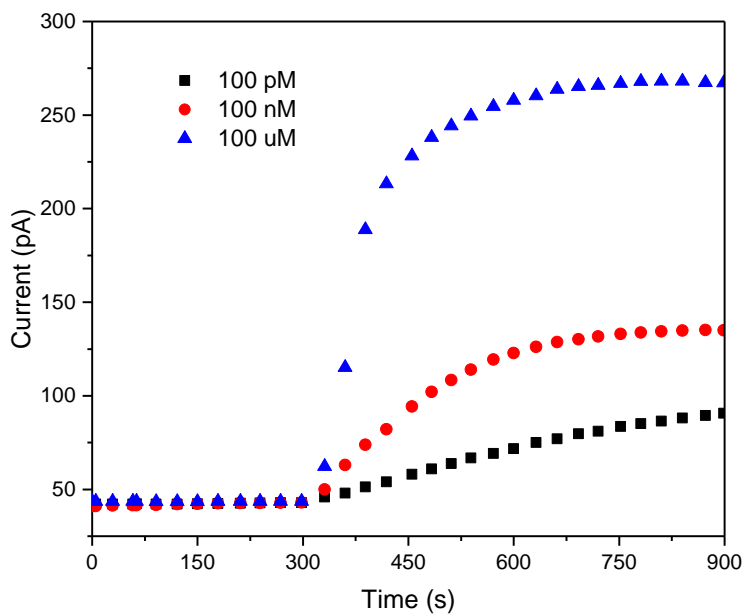

**Figure S3.** The relationship between current and incubation time on the performance of the biosensor with the three Ag(I) concentrations (100 pM, 100 nM, 100 μM) at  $V_G=0$  V.

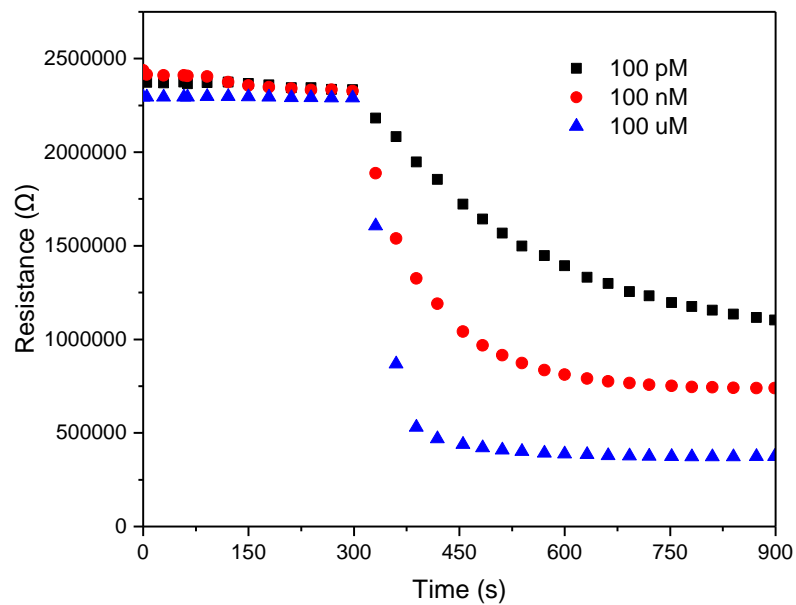

**Figure S4.** The relationship between resistance and incubation time on the performance of the biosensor with the three Ag(I) concentrations (100 pM, 100 nM, 100  $\mu$ M) at  $V_C=0$  V.

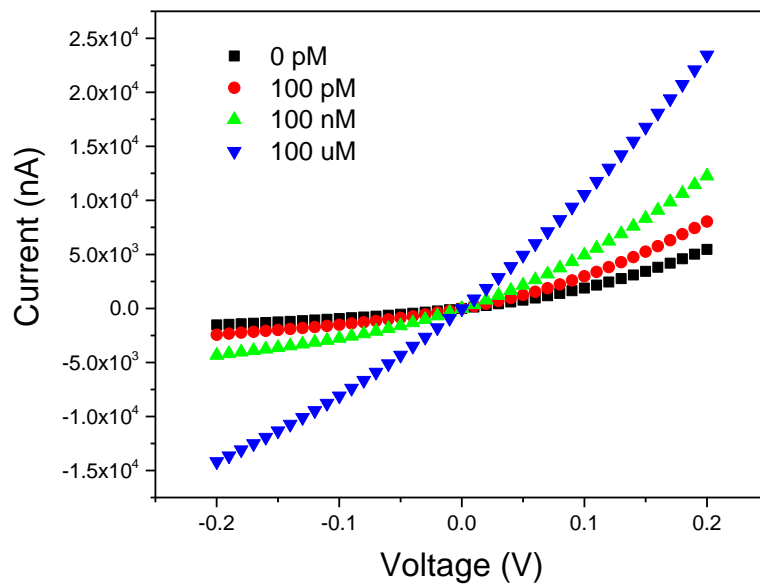

**Figure S5.** The effect of the voltage ranging from -0.2 V to 0.2 V on the performance of the biosensor with the three Ag(I) concentrations (0 pM, 100 pM, 100 nM, 100  $\mu$ M).

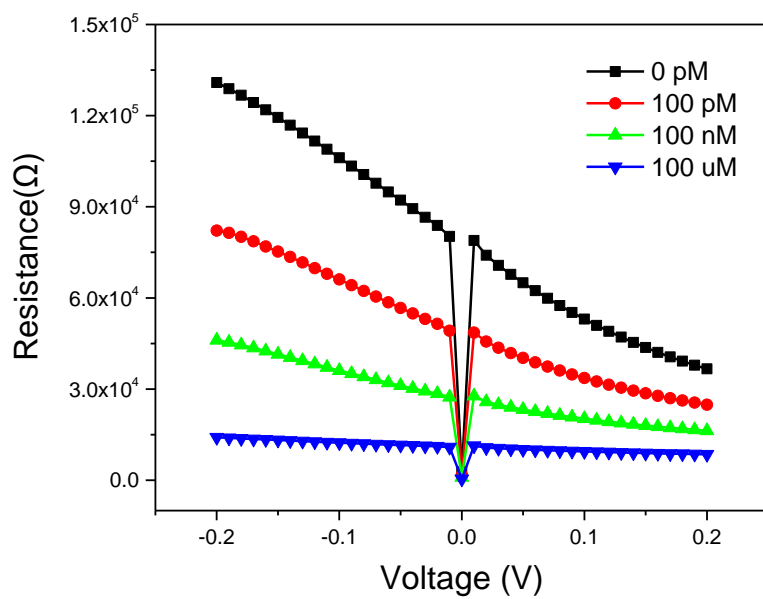

**Figure S6.** The resistance of the biosensor with the different Ag(I) concentrations (100 pM, 100 nM, 100 μM).
